1 A MALDI-MS biotyping-like method to address honey bee health status through  
2 computational modelling

3 Karim ARAFAH<sup>1</sup>, Sébastien Nicolas VOISIN<sup>1</sup>, Victor MASSON<sup>1,2</sup>, Cédric ALAUX<sup>3</sup>, Yves Le  
4 CONTE<sup>3</sup>, Michel BOCQUET<sup>4</sup>, Philippe BULET<sup>1,2\*</sup>

5 <sup>1</sup>Plateforme BioPark Archamps, Forum 1, 260 Avenue Marie Curie  
6 Archamps Technopole, F-74160 Saint Julien en Genevois, France

7 <sup>2</sup>CR UGA, Institute for Advanced Biosciences, Inserm U1209, CNRS UMR5309, Team Analytic  
8 immunology of Chronic diseases, Site Santé, Allée des Alpes, F-38000 Grenoble, France

9 <sup>3</sup>INRA PACA, UR 406 Abeilles et Environnement, 228 route de l'aérodrome, Site Agroparc, Domaine  
10 Saint-Paul, 84914 Avignon Cedex 9, France

11 <sup>4</sup>Apimedia, BP22 -Pringy- 74371 Annecy cedex, France

12 \*Corresponding Author, [philippe.bulet@univ-grenoble-alpes.fr](mailto:philippe.bulet@univ-grenoble-alpes.fr); secondary email:  
13 [philippe.bulet@biopark-archamps.org](mailto:philippe.bulet@biopark-archamps.org), direct line [+33\(0\)4 50 43 25 21](tel:+33(0)450432521)  
14  
15

16 Short title:

17 MALDI biotyping-like method to address bee health

18  
19 **Abstract:**

20 Among pollinator insects, bees undoubtedly account for the most important species. They play a  
21 critical role in boosting reproduction of wild and commercial plants and therefore contribute to the  
22 maintenance of plant biodiversity and sustainability of food webs. In the last few decades,  
23 domesticated and wild bees have been subjected to biotic and abiotic threats, alone or in combination,  
24 causing various health disorders. Therefore, monitoring solutions to improve bee health are  
25 increasingly necessary. MALDI mass spectrometry has emerged within this decade as a powerful  
26 technology to biotype micro-organisms. This method is currently and routinely used in clinical  
27 diagnosis where molecular mass fingerprints corresponding to major protein signatures are matched  
28 against databases for real-time identification. Based on this strategy, we developed MALDI  
29 BeeTyping as a proof of concept to monitor significant hemolymph molecular changes in honey bees  
30 upon infection with a series of entomopathogenic Gram-positive and -negative bacteria. A *Serratia*  
31 *marcescens* strain isolated from one “naturally” infected honey bee collected from the field was also  
32 considered. We performed a series of individually recorded hemolymph molecular mass fingerprints  
33 and built, to our knowledge, the first computational model made of nine molecular signatures with a  
34 predictive score of 97.92%. Hence, we challenged our model by classifying a training set of individual  
35 bees' hemolymph and obtained overall recognition of 91.93%. Through this work, we aimed at  
36 introducing a novel, realistic, and time-saving high-throughput biotyping-like strategy that addresses  
37 honey bee health in infectious conditions and on an individual scale through direct “blood tests”.

38

39 **Keywords:**

40 MALDI biotyping, Bee health, Immunity, *Apis mellifera*, Molecular mass fingerprint, Infection,  
41 *Serratia marcescens*, Computational model, Antimicrobial peptides

42

43 **Significance Statement:**

44 Domesticated and wild bees worldwide represent the most active and valuable pollinators that ensure  
45 plant biodiversity and the success of many crops. These pollinators and others are exposed to  
46 deleterious pathogens and environmental stressors. Despite efforts to better understand how these  
47 threats affect honey bee health status, solutions are still crucially needed to help beekeepers, scientists  
48 and stakeholders in obtaining either a prognosis, an early diagnosis or a diagnosis of the health status  
49 of the apiaries. In this study, we describe a new method to investigate honey bee health by a simple  
50 “blood test” using fingerprints of some peptides/proteins as health status signatures. By computer  
51 modelling, we automated the identification of infected bees with a predictive score of 97.92%.

52

53

## 54 **Introduction**

55 Over several decades, an abnormal mortality of honey bees and other pollinators (bumblebees, solitary  
56 bees) has been observed in all industrialized countries (1-4). This phenomenon has been particularly  
57 recorded in honey bees (5). The global loss of honey bee colonies has detrimental consequences for  
58 plant biodiversity, bee products, and negative economic and societal effects (6). As a result, many  
59 scientific studies have been carried out to understand the mechanisms underlying phenomena such as  
60 colony weakening or collapse and colony mortality observed in most of the countries practicing  
61 intensive agriculture. Many reports concluded that biotic and abiotic factors are suspected to be  
62 involved in this phenomenon, either alone or in combination (2, 5, 7-10). Potential causes are exposure  
63 to (i) environmental and in-hive chemicals (11, 12), (ii) agricultural practices (13, 14), (iii) infection  
64 by micro-organisms and predation by parasites (15-17) and (iv) nutritional factors (18-20), among  
65 others, which lead to the transition from a health status qualified as normal to a health decline that  
66 would contribute to the colony collapse (7). The expression of this pathological state may notably be  
67 linked to a decrease in the immune capacities of the bee and/or the colony subjected to these  
68 combinations of stressors (21-25). The complex underlying mechanisms of stressors (biotic and  
69 abiotic) that affect bees and impact honey bee health status remain still partially understood. Both the  
70 fundamental molecular mechanisms associated with the modifications of health status and the  
71 development of solutions capable of rendering a prognosis, an early diagnosis or a diagnosis, remain  
72 to be elucidated. This is a prerequisite for limiting colony losses and protecting honey bees, but the  
73 tools and services to perform a clear sanitary diagnosis of beehives are currently lacking. Even if  
74 visual and PCR analyses are available for surveillance of pathogen loads, prediction of the likely  
75 impact on the colony remains an issue not satisfactorily addressed (26). Apart from typical methods  
76 for honey bee colony health monitoring like polymerase chain reaction assays and sensor-based  
77 devices (27-29), mass spectrometry (MS), which has been greatly improved in the past 20 years, may  
78 play an essential role in the quest for innovative solutions in monitoring bee health. Among the  
79 different MS approaches, Matrix-Assisted Laser Desorption-Ionization – Time of Flight Mass  
80 Spectrometry (MALDI-TOF MS) has become increasingly popular for biological sample identification  
81 in laboratory research and for clinical diagnostics in microbiology. The widespread interest of this  
82 technology for analysing biological matrices is due to the generation of mostly monocharged ions  
83 which satisfy the generation of simplified mass spectra when analysing complex biological samples  
84 (30).

85 In the past ten years, MALDI-TOF MS has become a referenced system in microbiological  
86 laboratories. Technological developments, making this analytical technique a robust, fast and widely  
87 used commercial platform, paved the way for its use in routine clinical microbiology (31-33). In 2013,  
88 two independent systems, the VITEK<sup>®</sup> mass spectrometer (bioMérieux clinical Diagnostics) and the  
89 MALDI Biotyper<sup>®</sup> MicroFlex (Bruker Daltonics Inc.) received the US Food and Drug Administration  
90 (FDA) clearance for the identification by biotyping of micro-organism species including yeasts and

91 aerobic / anaerobic bacteria. In 2015, FDA clearance was announced for 193 and over 280 species  
92 using the VITEK<sup>®</sup> and the MALDI Biotyper<sup>®</sup> instruments, respectively (34, 35). These platforms  
93 perform by targeting the ribosomal proteins as biomarkers for the identification of clinical bacterial,  
94 fungal and yeast isolates (36). In early 2018, the Bruker MALDI Biotyper<sup>®</sup> solution received  
95 international approvals as an official method of analysis for the food industry (source from Bruker  
96 Corporation, related link <https://www.bruker.com>). Barcoding or molecular mass fingerprints (MFP)  
97 of biological matrices by MALDI-TOF MS is indeed a thriving approach, enabling the rapid detection  
98 of peptide/protein components that can provide comparative information.

99 Building on the concept of this MS-based MFP approach and on the demonstrated capability of  
100 MALDI-TOF MS to decipher the molecular mechanisms of insect immunity in the *Drosophila* model  
101 for various infections (37-39), we performed a peptidomics/proteomics-based mass fingerprinting of  
102 honey bee hemolymph using MALDI MS to discriminate different models of bacterial infections.  
103 Relying on previously published studies (39-42), we first developed and validated an experimental  
104 model of challenged honey bees with Gram-positive and -negative bacteria (using notably a *Serratia*  
105 *marcescens* strain isolated from honey bees). Then, we assessed the usefulness of MALDI-TOF MS to  
106 fingerprint the peptides/proteins in honey bee hemolymph in order to build and validate a  
107 computational model of bacterial recognition based on the molecular signatures within the molecular  
108 mass range 2-20 kDa; a method we will refer to as BeeTyping. In addition, we determined the  
109 performance of this computational model using a training set of challenged bees. Through this work,  
110 we introduce BeeTyping as an effective method for monitoring honey bee health status by diagnosing  
111 bacterial infections in young adult honey bees.

112

113

## 114 **Results & Discussion**

### 115 **MALDI-TOF MS Biotyping successfully diagnosed a bacterial strain isolated from** 116 **honey bee hemolymph.**

117 In order to generate relevant biological models of honey bee infections, we used the bacteria  
118 *Micrococcus luteus*, *Pectobacterium carotovorum* subsp. *carotovorum* and *Serratia entomophila*. *M.*  
119 *luteus* is a Gram-positive bacterial strain frequently used when monitoring insect immunity (43) and  
120 has been shown to colonize bee hives and gastrointestinal tracts of honey bees (44) while *P.*  
121 *carotovorum* subsp. *carotovorum* (45) and *S. entomophila* (Institut Pasteur, CIP102919) are two  
122 bacterial strains that trigger a systemic immune response in insects. We also performed an additional  
123 model of infection using a *Serratia marcescens* strain (*Sm*BIOP160412, Lab. collection) isolated from  
124 a naturally infected honey bee collected in the field. To certify the constructed biological models of  
125 infection, the four bacterial strains were classified by MALDI MS biotyping (Figure 1). As shown, the  
126 individual MFPs of the different strains detailed below and represented by the spectral gel views  
127 passed the threshold score of identification with a significant score (reliability score  $\geq 2$ ) and  
128 successfully matched the Bruker reference strains (see Fig. 1, *M. luteus* ref. 1270, *P. carotovorum*  
129 subsp. *carotovorum* ref. 78398, and *S. entomophila* ref. 42906) of the MALDI BioTyper® database.  
130 Moreover, applied to the bacterial strain *Sm*BIOP160412 isolated and cultured from an isolate  
131 obtained from a naturally infected honey bee, MALDI MS biotyping demonstrated for the first time to  
132 our knowledge, its ability to characterize a field bacterial infection in *Apis mellifera*. This identified  
133 bacterial strain, namely *S. marcescens*, is known to be a widespread pathogen of adult honey bees  
134 (46), and a virulent opportunist, taking advantage of disturbed microbiota to develop in honey bee guts  
135 after exposure to the pesticide glyphosate (47).

### 136 **MALDI-TOF MS BeeTyping as a new approach to discriminate Gram-positive and** 137 **-negative biological models of infection directly from honey bee hemolymph**

138 A set of 64 MALDI MS spectra was recorded from individual hemolymph samples. These spectra  
139 were obtained from 22 control honey bees and from 23 and 19 honey bees individually infected with  
140 the Gram-positive *M. luteus* or the Gram-negative *P. carotovorum* subsp. *carotovorum*, respectively.  
141 An averaged spectrum, containing 110 MALDI MS ion peaks (MFP, Table S1), was built for each of  
142 the three biological models (Figure 2A). Statistical analysis based on Principal Component Analysis  
143 (PCA) and performed on these MFPs clearly segregated the three biological models (Figure 2B). As  
144 shown by the PCA plot score, the individual spectra were clustered in accordance with their  
145 corresponding models and were segregated based on their mass fingerprints. The unsupervised  
146 hierarchical clustering of hemolymph samples, classified almost all of the individual MFPs with  
147 respect to their corresponding biological models (Figure 2C). Out of 64 normalized spectra used to  
148 build the clustering dendrogram, four and three recorded mismatched spectra were observed,

149 corresponding to the lowest (70%) and highest (95%) limits of explained variance, respectively. The  
150 mismatched spectra were further identified within the representation of the PCA plot score of the  
151 hemolymph samples (Figure 2B, arrows). At the limit of explained variance of 70%, the four spectra  
152 included one spectrum from the control condition and one from the *M. luteus* infection model, both  
153 classified under the *P. carotovorum* subsp. *carotovorum* model, and two of this latter model,  
154 mismatched to the control model (see asterisks in Fig. 2C). Regarding the three mismatched spectra  
155 observed at 95% of the explained variance, one was from the *M. luteus* model and classified under the  
156 *P. carotovorum* subsp. *carotovorum* model and two, from the *P. carotovorum* subsp. *carotovorum*  
157 model, classified under the control model (see asterisks in Fig. 2C).

158 In order to assess the relationship between the MALDI-TOF MS MFPs of the biological models and  
159 the honey bee's immune status, we correlated these MFPs with each of the four antimicrobial peptides  
160 (AMP) defined from *Apis mellifera* (48): Apidaecin 1A (41) at  $m/z$  2,107, Hymenoptaecin (49) at  $m/z$   
161 10,270, Abaecin (50) at  $m/z$  3,878 and Defensin 1A (40) at  $m/z$  5,519 (Figure 3). As shown, per-peak  
162 fingerprint correlations with the antimicrobial peptides (AMPs) were scored based on the molecular  
163 ion peak area and represented as heat maps through a colored scale intensity ranging from low  
164 (minimum score of -1, in red) to high correlation (maximum score of 1, in green). Reported in relation  
165 to the MFPs, four clades (A, B, C and D) described the positive and negative correlations of the MFPs  
166 with each of the four AMPs (see Table S1) and segregated the three biological models (non-  
167 experimentally infected as a control condition, *P. carotovorum* subsp. *carotovorum*. model and *M.*  
168 *luteus* model, see Fig. 3).

169 Regarding the control condition, the four AMPs were found to be positively correlated with the  
170 molecular ion markers of the hemolymph MFPs of clades A, C and D and negatively correlated with  
171 markers of clade B. In the *P. carotovorum* subsp. *carotovorum* model, the same four AMPs were  
172 positively correlated with the MFPs of clades B and C and negatively with clade A and D markers,  
173 except for Hymenoptaecin, which exhibited positive and negative correlations with clade D. In the *M.*  
174 *luteus* model of infection, each of the AMPs was predominantly positively correlated with the  
175 molecular clades A and B, and negatively with clades C and D. These correlations show  
176 complementary molecular signatures in the three experimental models. Discrete dynamic molecular  
177 patterns are modulated and correlated to the immune status of the bees, allowing us to discriminate  
178 infected from non-infected bees and the type of infection

### 179 **Machine-learning as the first reported computational model to recognize and** 180 **classify experimentally infected honey bees based on hemolymph MFPs**

181 Because the proteomic mass spectra of hemolymph samples reflect the immune status of  
182 the honey bees, our next goal was to predict honey bee health status based on the bee  
183 MALDI-TOF MS MFPs. For that purpose, we decided to build a molecular model based  
184 on the MFPs of hemolymph samples, by using a machine-learning algorithm, the

185 Genetic Algorithm (GA). The GA classifier generated a set of discriminating peaks that  
186 recognized and classified hemolymph according to the biological model (honey bees  
187 challenged with *P. carotovorum carotovorum* or *M. luteus* and non-experimentally  
188 infected honey bees). These discriminating peaks form a barcode model and define the  
189 strength of this model through its recognition capability. The performance of the  
190 classifier barcode model was evaluated through internal cross validation by iterative  
191 reclassification of a set of spectra equal to half of the total number of spectra included  
192 in the model. For each of the ten iterations performed, a new set of spectra was chosen  
193 randomly through an automated internal process.

194 In an initial approach, we restricted our experimental infection to *M. luteus* as the Gram-positive strain  
195 and to *P. carotovorum* subsp. *carotovorum*. While this is, to our knowledge, the first time such a  
196 computational model has been applied to the classification of bacterial-infected honey bees, machine-  
197 learning algorithms have been used previously in other biological subjects. For example, MALDI MS  
198 has been successfully used to build a proteomic mass spectra database of different honeys and their  
199 MFPs to identify their geographical origin (51). As another example of application, an experimental  
200 model of male chicken fertility was designed to perform on-cell direct proteomic fingerprinting by  
201 MALDI MS and demonstrated the capability of the GA classifier to build a predictive model to  
202 classify chicken sperm fertility (52).

203 In the present study, using GA, based on the individual hemolymph spectra of a cohort of 22 controls  
204 and 23 honey bees challenged with *M. luteus* or 20 honey bees challenged with *P. carotovorum* subsp.  
205 *carotovorum*, we identified a set of nine best  $m/z$  molecular ions based on their capability to  
206 discriminate the three biological models from each other (Figure 4). Further tests of recognition  
207 capability and cross validation of the GA model were assessed by using the MFPs from the same  
208 sample cohort. Considering the standard deviation and the 95% confidence interval of these nine  
209 molecular ions, weight indexes were calculated to rank the nine molecular signatures from the most  
210 discriminant molecular ion ( $m/z$  3,348.17, weight of 6.24) to the least discriminant one ( $m/z$  5,603.01,  
211 weight of 1.97). Moreover, we rated the accuracy of the GA classifier model following two distinct  
212 data processings. On the one hand, the classifier calculated the recognition capability by matching the  
213 MALDI MS spectra described above against their respective biological models. Therefore, we were  
214 able to re-assign hemolymph spectra derived from the control and the *M. luteus* biological models  
215 (score of recognition 100%) and for the *P. carotovorum* subsp. *carotovorum* model (score of 93.75%).  
216 Overall, performance recognition of the classifier reached 97.92%. On the other hand, internal cross  
217 validation scores were calculated for each biological model. To perform this cross validation, the same  
218 individual hemolymph spectra from each biological model were randomized and reassessed for  
219 successful matching in a batch mode of analysis by the classifier using solely the set of the nine  
220 molecular ion markers. The cross validations of the classifier were at 91.51%, 94.40% and 89.87% for

221 the control, *M. luteus* and *P. carotovorum* subsp. *carotovorum* biological models, respectively, giving  
222 an overall validation of 91.93% (see Fig. 4).

223 A new set made of 26, 10 and 35 MALDI MS spectra of hemolymph from control, *M. luteus* and *P.*  
224 *carotovorum* subsp. *carotovorum* biological models respectively was submitted for the to the GA  
225 classifier and classified individually (Table 1 and Table S2). Among the 26 control spectra, 16 were  
226 correctly classified, three were classified in *P. carotovorum* subsp. *carotovorum* and three in *M. luteus*  
227 models. Four spectra were found as invalid spectra because of the recalibration step. This result was  
228 caused by weaker intensities of the molecular fingerprints causing the ion mass recalibration to fail.

229 Regarding the *M. luteus* infectious model, 10 spectra were subjected to the classifier. Seven were  
230 correctly classified, two were considered as control and one as belonging to the *P. carotovorum* subsp.  
231 *carotovorum* model. No spectrum was deemed invalid. Considering the *P. carotovorum* subsp.  
232 *carotovorum* biological model of infection, from the 37 spectra, 13 were correctly classified, one  
233 matched to the control, three to the *M. luteus* biological models and 20 to the invalid spectra category.

234 These 20 spectra were qualified as invalid due to noisy mass spectra (intensities of the nine peaks not  
235 sufficient to pass the classification) or to a failure in properly calibrating the mass spectra. Given these  
236 results, we calculated the performance of the classifier for each of the biological model (see details in  
237 Table 2). The GA algorithm achieved 80 % to 90 % accuracy discriminating thus the three biological  
238 models. The sensitivity (true positive) and the specificity (true negative) of the GA classifier model  
239 were calculated for the three biological models. The model scored at least 70% of sensitivity and at  
240 least 84 % of specificity. As detailed in the Table 2, the highest sensitivity was observed for the *P.*  
241 *carotovorum* subsp. *carotovorum* model (76.47 %) and the highest specificity for the control model  
242 (95.16 %). Based on the sensitivity and the specificity, we calculated the informedness indexes and the  
243 positive-negative stratum-specific likelihood ratio (abbreviated +LR, -LR) which inform about how  
244 predictive the classifier model is and its performance as a diagnostic tool respectively. As reported in  
245 the Table 2, the three biological models scored indexes within the range [-1 ;1] with -1 as incorrect  
246 model predictions, 1 as maximum of correct predictions). The calculated informedness indexes for the  
247 control, the *P. carotovorum* subsp. *carotovorum* scoring 0.68 and 0.64 respectively and for the *M.*  
248 *luteus* (0.55) demonstrated the model was a good predictor. Regarding +LR and -LR, both parameters  
249 were calculated. The +LR, which required scores over 1 to be significant were found equal to 15.02;  
250 4.55 and 6.12 for the control, the *M. luteus* and the *P. carotovorum* subsp. *carotovorum* models  
251 respectively (Table 2). This result demonstrated a good probability that our GA model classified  
252 positively the spectra against the biological models. The -LR, which required scores as close as  
253 possible to 0 to be significant were found equal to 0.28; 0.35 and 0.27 for the control, the *M. luteus*  
254 and the *P. carotovorum* subsp. *carotovorum* models respectively (Table 2). This result demonstrated  
255 the weak probability to misclassify the cohort of hemolymph spectra through the GA classifier. In  
256 addition, we determined the false discovery rate (q-value) and the false positive rate (p-value) for each  
257 of the three biological models. The lowest q-value was of 0.158 and concerned the control model



258 while *P. carotovorum* subsp. *carotovorum* and *M. luteus* models harbored highest values (0.235 and  
259 0.461 respectively) denoting a better capability of the classifier to classify unknown spectra within the  
260 control model followed by the *P. carotovorum* subsp. *carotovorum* and *M. luteus* models respectively.  
261 Regarding the p-values, the control model harbored 0.0484 while *P. carotovorum* subsp. *carotovorum*  
262 and *M. luteus* models scored 0.125 and 0.154. Based on this statistical parameter, the classifier shares  
263 the same conclusion as obtained with the q-values regarding the algorithm's performance to classify  
264 properly the spectra.

265

266 To summarize, the computational model significantly discriminated control from  
267 infected honey bees and *M. luteus* from *P. carotovorum* subsp. *carotovorum* infection as well  
268 on the basis of the hemolymph mass fingerprints.

269

### 270 **MALDI-TOF MS BeeTyping as an effective molecular method to discriminate** 271 **honey bees infected with different *Serratia* species**

272 We assessed the performance of MALDI BeeTyping to discriminate infection at the  
273 species level, in particular between two *Serratia* species: *S. marcescens* isolated from a  
274 naturally infected honey bee (*Sm*BIOP160412, Lab. collection) and a reference strain of  
275 *S. entomophila* (see dendrogram, Figure 1). We found that the MFPs of the hemolymph  
276 samples collected from honey bees infected by *S. entomophila* and *S. marcescens*  
277 presented significant molecular differences (Figure 5A).

278 Moreover, by using the two best discriminant molecular ions ( $m/z$  12,752.8 and  $m/z$   
279 7,186.95), revealed by the PCA analysis, we could differentiate the hemolymph spectra  
280 of bees infected either with *S. entomophila* or *S. marcescens* *Sm*BIOP160412. In  
281 contrast, the two weaker discriminant markers  $m/z$  1,996.14 and  $m/z$  6,113.68 failed to  
282 discriminate the two types of spectra resulting from the two *Serratia* species (Figure  
283 5B).

284 To further evaluate and rank the measured ion markers within the MFPs based on their  
285 capability to discriminate the two *Serratia* species, we performed a receiver operating  
286 curve (ROC) analysis to highlight eight  $m/z$  ion markers (12,752.8; 7,186.95; 7,688.27;  
287 10,269.8 (Hymenoptaecin); 5,057.69; 5,160.28) with AUC scores between 0.8 and 1 in  
288 sensitivity (Figure 5C). The Apidaecin, Abaecin and Defensin were also checked for  
289 their capability to discriminate the two *Serratia* species (Figure S1). Based on the ROC  
290 test, Abaecin and Defensin were also capable to discriminate, to some extent, the two  
291 *Serratia* species (see Figure S1) (AUC of 0.739 and 0.639, respectively). However, like  
292 the two markers  $m/z$  1,996.14 and 6,613.68, Apidaecin (AUC=0.520) revealed to be a  
293 poor discriminant (Figure 5D). Hence, based on these results, it seems possible to

294 discriminate infection by *S. marcescens* from *S. entomophila* in honey bees using  
295 computational modelling. To our knowledge, this is the first report on the feasibility of  
296 using MALDI MS as an MFP-based method capable of discriminating hemolymph  
297 molecular response to systemic infections induced by two different bacterial species of  
298 the same genus. *S. marcescens* is known to be a commensal bacterium present in low  
299 abundance in the gut of honey bees. By studying the pathogenicity of different strains  
300 of *S. marcescens* through two routes of *in vivo* exposure (oral and direct injection into  
301 the hemolymph), Raymann et al (46) found that expression of the four honey bee AMPs  
302 Abaecin, Defensin, Hymenoptaecin and Apidaecin did not differ between infected and  
303 non-experimentally infected control honey bees. These results support the idea that  
304 markers other than AMPs need to be identified and monitored to efficiently  
305 discriminate bacterial infections in honey bee hemolymph. As we demonstrated, the  
306 correlation of the molecular fingerprints and the AMPs in hemolymph allowed us to  
307 discriminate the three different models. In order to determine how specific were the  
308 nine markers of the classifier to the control, *M. luteus* and *P. carotovorum* subsp.  
309 *carotovorum* biological models, we tested the classification of the hemolymph mass fingerprints of  
310 honey bees infected using the two *Serratia* strains. We submitted 13 MALDI mass fingerprints of  
311 hemolymph from infected bees with *S. entomophila* to the classifier. One was classified as control,  
312 seven as fitting with the *P. carotovorum* subsp. *carotovorum* model, and one fitting with the *M.*  
313 *luteus* model. The classifier excluded four hemolymphs' fingerprints because of noisy  
314 spectra signal or invalid mass recalibration. We also submitted 19 MALDI mass fingerprint  
315 of hemolymph from infected bees with *S. marcescens* to the classifier, which identified two as control,  
316 five as fitting with the *P. carotovorum* subsp. *carotovorum* model, and four fitting with the *M. luteus*  
317 model. The classifier excluded eight hemolymphs' fingerprints for the same reasons as  
318 above. Interestingly, the majority of the classified spectra from both, the *S.*  
319 *entomophila* and *S. marcescens* models matched with the *P. carotovorum* subsp.  
320 *carotovorum* model. It is particularly interesting as these three bacteria are Gram-negative.  
321 Nevertheless, some spectra matched against the control and the *M. luteus* models. Taking  
322 altogether, these results suggest that the BeeTyping approach generates specific  
323 molecular barcodes defined accordingly to biological models.

324

325

## 326 **Conclusion**

327 Along with most relevant, technically feasible and primary observation-based health status  
328 indicators highlighted by EFSA's HEALTHY-B, MALDI-MS BeeTyping, a method derived

329 from the biotyping approach used routinely in clinical microbiology, analyze the downstream  
330 responses to stressors through the matured effector molecules circulating in the hemolymph.  
331 These effectors include the products of selected immune genes (i.e. genes coding for  
332 Apidaecin, Defensin, Hymenoptaecin, and Abaecin) and other molecular mass fingerprints of  
333 stress that we are under characterization through a proteomic approach. Our approach of  
334 MFPs by MALDI-MS BeeTyping, is a cutting-edge analytic method that may complement  
335 and address some limitations issued of the HEALTHY-B toolbox by establishing robust,  
336 effective, sensitive and a comprehensive technology for profiling and deciphering, at the  
337 individual level, the honeybee health parameters including its immunity stage with regards to  
338 bacterial stressors. Moreover, as a robust and sensitive molecular approach, MALDI BeeTyping has  
339 several advantages over other molecular biology techniques and visual observations, such as (i) the  
340 use of a drop of hemolymph allowing to keep the rest of the body for complementary molecular  
341 measurements such as PCR, (ii) a very simple and fast sample preparation, (iii) a short processing time  
342 (data acquisition and processing), (iv) low consumable costs, and (v) a user friendly workflow that can  
343 be standardized and automated for cost-effective high throughput use. We believe that future  
344 developments of MALDI BeeTyping could improve monitoring of honey bee health upon  
345 exposure to other biotic or abiotic stressors, the quality control and the origin traceability of  
346 apiary products based on molecular markers fingerprinting. Based on specific proteomics  
347 signatures, MALDI BeeTyping could bring out a novel analytical tool for early diagnosis of  
348 honey bees parasited with *Nosema* species, *Varroa destructor* and infected or not with  
349 deformed wing virus or acute bee paralysis virus. We aim at developing the BeeTyping  
350 strategy for early diagnosis of honey bees health disorders.

351

## 352 **Material & Methods**

353 The BeeTyping strategy relies on a workflow divided into four major steps summarized  
354 in Table S2 and described in this section.

### 355 **Biological models**

#### 356 *Bacterial strains*

357 To generate biological models of infection, we used the Gram-negative strains  
358 *Pectobacterium carotovorum* subsp. *carotovorum* 15 (formerly *Erwinia carotovora*  
359 *carotovora* 15 CFBP2141, generous gift from Bruno Lemaitre, EPFL Switzerland),  
360 *Serratia entomophila* (Institut Pasteur, CIP102919) and a *Serratia marcescens* strain  
361 (*Sm*BIOP160412, our laboratory collection) isolated within the haemocoel from a  
362 naturally infected *Apis mellifera* honey bee collected in the field, and the Gram-positive  
363 *Micrococcus luteus* (ATCC 4698). Bacteria were cultured in Luria Bertani (LB) medium  
364 overnight at 32°C.

#### 365 *Bacterial strain identification by MALDI biotyping*

366 The *Pectobacterium carotovorum* subsp. *carotovorum*, *Serratia marcescens*, *S. entomophila* and  
367 *Micrococcus luteus* strains were identified following Bruker's recommendations. Briefly,  
368 one isolated colony of bacteria was spread onto a MALDI plate dedicated for  
369 microorganism identifications (MALDI Biotarget 48 polished steel) and mixed with  
370 1µL of Alpha-Cyano-4-hydroxycinnamic acid (4-HCCA) MALDI matrix. Spectra were  
371 recorded using the MALDI-TOF MS AutoFlex III instrument and the associated materials,  
372 chemicals and software package used for MALDI biotyping were all from Bruker Daltonik  
373 (Germany) using the standard method (pre-processing step for which the lower mass  
374 was set at 2,000, with a resolution of 5, and a compressing factor of 1). The smoothing  
375 frame size was 20Da and the search window was 10Da with three runs for the baseline  
376 subtraction. For the peak-picking, the maximum number of peaks was set at 200, with a  
377 threshold of 0.0045. The method of peak-picking was based on peak fitting using the  
378 Gauss profile. The recorded spectra were matched against the dedicated database MBT  
379 Compass 4.1, build 70. The obtained gel spectra for the identified bacteria and their  
380 corresponding dendrograms were built under MBT Compass Explorer 4.1 using the  
381 standard method of identification. For external calibration of the mass spectrometer, a  
382 mix of 1µL of bacterial test standard proteins (BTS) covering the entire mass range  
383 ( $m/z$  2,000-20,000) of the acquisition method was analyzed using the same protocol.

#### 384 *Experimental infection of the honey bees*

385 Experimental infections were performed on newly-emerged honey bee workers (less  
386 than 12h old). To design the computational analyses, a training set of spectra was built

387 using non experimentally infected (unpicked control) bees and bees infected with either  
388 *Pectobacterium carotovorum* subsp. *carotovorum* 15, *M. luteus*, *S. entomophila* or the  
389 isolated *Serratia marcescens* SmBIOP160412 strain. Infections were performed by  
390 pricking honey bees individually in the anterior lateral thorax (spiracle) using a fine  
391 needle (Fine Science Tools, Germany) dipped into a freshly concentrated culture pellet  
392 of live bacteria. All honey bees (experimentally infected and controls) were placed for  
393 24h at room temperature in dedicated small cages and fed *ad libitum* with sugar syrup  
394 (Invertbee from SARL Isnard, France) containing fructose (36%), dextrose (30%),  
395 saccharose (31%), maltose (1.5%) and other sugars (1.5%). Hemolymph was collected  
396 from the dorsal side of the abdomen, using pulled glass capillaries (Sutter Instrument  
397 Corp, Novato, California). The collected hemolymph was immediately transferred into a  
398 chilled LoBind Protein microtube (Eppendorf, Germany) pre-coated with  
399 Phenylthiourea and Phenylmethylsulfonyl fluoride (both from Sigma Aldrich, France)  
400 to prevent melanization and proteolysis, respectively. The hemolymph samples were  
401 stored at -20°C until use.

## 402 **Molecular mass fingerprints by MALDI MS**

### 403 *Data acquisition*

404 Each individual hemolymph sample was analyzed with the Bruker AutoFlex™ III. The  
405 molecular mass fingerprints (MFP) were acquired following the Bruker Biotyper®  
406 recommendations (matrix, method of sample deposition and detection) with minor  
407 adjustments. Briefly, the hemolymph samples were 10-fold diluted in acidified water  
408 (0.1% trifluoroacetic acid, Sigma Aldrich, France) and 0.5µL of a given sample was  
409 mixed with 0.5µL of 4-HCCA (Sigma Aldrich, France) on a MALDI MTP 384 polished  
410 ground steel plate (Bruker Daltonik). Following co-crystallization of the hemolymph  
411 spots with the matrix droplet, MALDI MS spectra were recorded in a linear positive  
412 mode and in an automatic data acquisition using FlexControl 4.0 software (Bruker  
413 Daltonik). The following instrument settings were used: 1.5kV of electric potential  
414 difference, dynamic range of detection of 600 to 18,000 Da, 69% of laser power, a  
415 global attenuator offset of 46% with 200Hz laser frequency, and 2,000 accumulated  
416 laser shots per hemolymph spectrum with a raster of random walk set to 50. The linear  
417 detector gain was setup at 1.82kV with a suppression mass gate up to  $m/z$  600 to  
418 prevent detector saturation by clusters of the 4-HCCA matrix. The pseudo-molecular  
419 ions desorbed from the hemolymph were accelerated under 1.5kV. An external  
420 calibration of the mass spectrometer was performed using a standard mixture of  
421 peptides and proteins (Peptide Standard Calibration II and Protein Standard Calibration  
422 I, Bruker Daltonik) covering the dynamic range of analysis.

423 *Data post-processing and statistical analyses*

424 The MALDI-MS datasets were imported into the ClinProTools™ 2.2 Software (Bruker  
425 Daltonik) for post-processing and statistical analyses. All of the recorded spectra were  
426 processed with a baseline subtraction and spectral smoothing followed by an internal  
427 recalibration step with exclusion of null and/or “non-recalibratable” spectra. The total  
428 averaged spectra were calculated based on a signal over noise ratio equal to 5 for peak-  
429 picking and area calculations. The irrelevant spectra that did not pass the required  
430 signal intensity and resolution were excluded from any integration into the MALDI-MS  
431 computational model designed to match the biological models of honey bee infections.  
432 A post-processing step involving spectral normalization of all calculated peak area was  
433 performed with ClinProTools™ software prior to statistical analysis (95% confidence  
434 interval, standard deviation and Principal Component Analysis-PCA).

435 *Hierarchical Clustering, heat maps and ROC curves*

436 The total number of spectra used to design the computational models were normalized  
437 and subjected to PCA and unsupervised hierarchical clustering analysis to measure  
438 distances between spectra. This analysis was used to determine Euclidean distances  
439 (based on PCA results with a reduced dimension limited to 70% and 95% of the total  
440 explained variance). The molecular correlation between four antimicrobial peptides  
441 (AMPs) known from the honey bee [Apidaecin 1A at  $m/z$  2,107 (Uniprot entry  
442 A0A088AIG0), Hymenoptaecin at  $m/z$  10,270 (Uniprot entry Q10416), Abaecin at  $m/z$   
443 3,878 (Uniprot entry P15450) and Defensin 1A at  $m/z$  5,519 (Uniprot entry P17722)];  
444 and mass fingerprints (MFP) of the three biological models of infection were calculated  
445 and represented with a heat map. The receiver operating characteristic (ROC) analyses  
446 were built using the ClinProTools™ program and the heat maps, using the OMICs add-  
447 on module provided by the XLSTAT program (interquartile threshold value of 0.25).

448 *Computational-based algorithm & machine learning model*

449 In the scope of delivering a barcode model capable of discriminating infected from  
450 control honey bees, a training set of spectra was established by fingerprinting the  
451 corresponding hemolymph samples using MALDI MS. Series of individual spectra were  
452 recorded from 22 controls, 23 honey bees challenged with *M. luteus*, 20 with *P.*  
453 *carotovorum* subsp. *carotovorum* 15, and an equal number of 15 spectra from bees  
454 challenged with *S. entomophila* and *S. marcescens* SmBIOP160412. Data clustering  
455 (optimal spectral separation combined with the determination of a fixed number of  
456 peaks within the training set) was performed using the Genetic Algorithm (GA) with the

457 ClinProTools™ software. The GA parameters were as follow: a maximum of 10 peaks  
458 harboring the greatest weight was selected and included in the model. A number of 50  
459 generations (iterative algorithm searching) was chosen to achieve this maximum of  
460 peaks. The k-nearest neighbor parameter, which is a key parameter of artificial  
461 intelligence used in supervised machine learning, was set at 3.

462

#### 463 *External validation of the barcode model and classification of unknown spectra*

464 In order to assess the capability of the GA classifier to recognize the infected bees from the control  
465 group, a new set of hemolymph MS spectra, never processed in the classifier model, was used to  
466 perform an external validation. This experimental set of honey bees included the three biological  
467 models; 26 controls, 37 infected honey bees with *P. carotovorum* subsp. *carotovorum* 15 and 10 with  
468 *M. luteus*. By submitting those hemolymph spectra to the classifier resulted in counting the correctly  
469 classified spectra, and also the mismatched and the invalid ones. In order to assess the performance of  
470 our classifier model, accuracy, sensitivity, specificity, informedness, specific-positive and negative  
471 likelihood ratios, false discovery rate (q-value) and false positive rate (p-value) were calculated. The  
472 accuracy, which informs on how efficient the model is, was calculated according to Wang *et al.* (53).  
473 Sensitivity scores real positive cases that are correctly predicted positive by the model and the  
474 specificity scores the opposite i.e. the real negative cases that are correctly predicted negative.  
475 Informedness scores the probability that a prediction (e.g. result of a machine-learning model to  
476 classify one condition against the others) is informed regarding to the tested condition *versus* odds.  
477 Informedness helps to make diagnosis decision. Sensitivity, specificity and informedness were  
478 determined as previously described (54). The specific-positive and -negative likelihood ratios  
479 (abbreviated +LR and -LR) classically used in diagnostic testing with multiple classes informs  
480 on how likely the results from the classifier model will match the condition. +LR gives the  
481 change in the odds of satisfying the condition (fitting to the biological models), given a  
482 positive test result and -LR, the change in the odds of satisfying the condition when the test  
483 comes negative. +LR ranges from zero to infinity. With +LR values between zero and one,  
484 there is a weak probability that the test matches the condition. If the ratio equals to one, then  
485 the test lacks diagnostic value and if the ratio is  $>1$ , then the test increases the probability to  
486 match correctly with the condition. Regarding -LR, the closer to zero the value is, the more  
487 informative the test is (55).

488

#### 489 **Acknowledgements**

490 We would like to thank Dr. Bruno Lemaitre from the Ecole Polytechnique Fédérale de Lausanne –  
491 (EPFL, Switzerland) and the Institut Pasteur de Paris for their generous gifts (*Micrococcus luteus*

492 strain and *Serratia entomophila* respectively). We are also thankful to Paul-Arthur Sol and Erwan  
493 Weber for their contribution during their Master 2 training. Financial support was provided by  
494 FEAGA (FranceAgriMer), N°14-04R and from the Association Plateforme BioPark of Archamps from  
495 its Research & Development budget.



## 496 References

- 497 1. Biesmeijer JC, et al. (2006) Parallel declines in pollinators and insect-pollinated plants in Britain and the Netherlands. *Science* 313(5785):351-354.
- 498 2. Potts SG, et al. (2010) Global pollinator declines: trends, impacts and drivers. *Trends in ecology & evolution* 25(6):345-353.
- 499 3. AJ V (2013) Threats to an ecosystem service: pressures on pollinators. *Front Ecol Environ* 11(5):251-259.
- 500 4. Koh I, et al. (2016) Modeling the status, trends, and impacts of wild bee abundance in the United States. *Proceedings of the National Academy of Sciences of the United States of America* 113(1):140-145.
- 501 5. Goulson D, Nicholls E, Botias C, & Rotheray EL (2015) Bee declines driven by combined stress from parasites, pesticides, and lack of flowers. *Science* 347(6229):1255-1257.
- 502 6. Breeze TD, et al. (2014) Agricultural policies exacerbate honeybee pollination service supply-demand mismatches across Europe. *PLoS one* 9(1):e82996.
- 503 7. Smith KM, et al. (2013) Pathogens, pests, and economics: drivers of honey bee colony declines and losses. *EcoHealth* 10(4):434-445.
- 504 8. Dainat B, Vanengelsdorp D, & Neumann P (2012) Colony collapse disorder in Europe. *Environmental microbiology reports* 4(1):123-125.
- 505 9. Neumann P. CN (2010) Honey bee colony losses. *Journal of apicultural research* 49:1-6.
- 506 10. Steinhauer N, et al. (2018) Drivers of colony losses. *Current opinion in insect science* 26:142-148.
- 507 11. Mullin CA, et al. (2010) High levels of miticides and agrochemicals in North American apiaries: implications for honey bee health. *PLoS one* 5(3):e9754.
- 508 12. Wu JY, Smart MD, Anelli CM, & Sheppard WS (2012) Honey bees (*Apis mellifera*) reared in brood combs containing high levels of pesticide residues exhibit increased susceptibility to *Nosema* (Microsporidia) infection. *Journal of invertebrate pathology* 109(3):326-329.
- 509 13. Clermont A, Eickermann M, Kraus F, Hoffmann L, & Beyer M (2015) Correlations between land covers and honey bee colony losses in a country with industrialized and rural regions. *The Science of the total environment* 532:1-13.
- 510 14. Smart M, Pettis J, Rice N, Browning Z, & Spivak M (2016) Linking Measures of Colony and Individual Honey Bee Health to Survival among Apiaries Exposed to Varying Agricultural Land Use. *PLoS one* 11(3):e0152685.
- 511 15. Beyer M, et al. (2018) Winter honey bee colony losses, *Varroa destructor* control strategies, and the role of weather conditions: Results from a survey among beekeepers. *Research in veterinary science* 118:52-60.
- 512 16. Traver BE, Feazel-Orr HK, Catalano KM, Brewster CC, & Fell RD (2018) Seasonal Effects and the Impact of In-Hive Pesticide Treatments on Parasite, Pathogens, and Health of Honey Bees. *Journal of economic entomology* 111(2):517-527.
- 513 17. Desai SD & Currie RW (2016) Effects of Wintering Environment and Parasite-Pathogen Interactions on Honey Bee Colony Loss in North Temperate Regions. *PLoS one* 11(7):e0159615.
- 514 18. Di Pasquale G, et al. (2013) Influence of pollen nutrition on honey bee health: do pollen quality and diversity matter? *PLoS one* 8(8):e72016.
- 515 19. Alaux C, Dantec C, Parrinello H, & Le Conte Y (2011) Nutrigenomics in honey bees: digital gene expression analysis of pollen's nutritive effects on healthy and *varroa*-parasitized bees. *BMC genomics* 12:496.
- 516 20. Dolezal AG & Toth AL (2018) Feedbacks between nutrition and disease in honey bee health. *Current opinion in insect science* 26:114-119.
- 517 21. Sinpoo C, Paxton RJ, Disayathanoowat T, Krongdang S, & Chantawannakul P (2018) Impact of *Nosema ceranae* and *Nosema apis* on individual worker bees of the two host species (*Apis cerana* and *Apis mellifera*) and regulation of host immune response. *Journal of insect physiology* 105:1-8.
- 518 22. Nazzi F, Annoscia D, Caprio E, Di Prisco G, & Pennacchio F (2014) Honeybee immunity and colony losses. *Entomologia* 2(203):80-86.
- 519 23. Flenniken ML & Andino R (2013) Non-specific dsRNA-mediated antiviral response in the honey bee. *PLoS One* 8(10):e77263.
- 520 24. Zhang Y, Liu X, Zhang W, & Han R (2010) Differential gene expression of the honey bees *Apis mellifera* and *A. cerana* induced by *Varroa destructor* infection. *Journal of insect physiology* 56(9):1207-1218.
- 521 25. Di Prisco G, et al. (2013) Neonicotinoid clothianidin adversely affects insect immunity and promotes replication of a viral pathogen in honey bees. *Proceedings of the National Academy of Sciences of the United States of America* 110(46):18466-18471.
- 522 26. (2016) E (2016) Assessing the health status of managed honeybee colonies (HEALTHY-B): a tool box to facilitate harmonised data collection. *EFSA Journal* 14(10):1-248.
- 523 27. Meikle W, Holst N (2015) Application of continuous monitoring of honeybee colonies. *Apidologie* 46:10-22.
- 524 28. Gil-Lebrero S, et al. (2016) Honey Bee Colonies Remote Monitoring System. *Sensors* 17(1).
- 525 29. Becher MA, et al. (2018) Bumble-BEEHAVE: A systems model for exploring multifactorial causes of bumblebee decline at individual, colony, population and community level. *The Journal of applied ecology* 55(6):2790-2801.
- 526 30. Karas M (2012) *A history of european mass spectrometry* (IM Publications LLP).
- 527 31. Spinali S, et al. (2015) Microbial typing by matrix-assisted laser desorption ionization-time of flight mass spectrometry: do we need guidance for data interpretation? *Journal of clinical microbiology* 53(3):760-765.
- 528 32. De Respinis S, et al. (2014) Matrix-assisted laser desorption ionization-time of flight (MALDI-TOF) mass spectrometry using the Vitek MS system for rapid and accurate identification of dermatophytes on solid cultures. *Journal of clinical microbiology* 52(12):4286-4292.
- 529 33. van Belkum A, et al. (2013) Rapid clinical bacteriology and its future impact. *Annals of laboratory medicine* 33(1):14-27.
- 530 34. Senan S, et al. (2015) Geriatric Respondents and Non-Respondents to Probiotic Intervention Can be Differentiated by Inherent Gut Microbiome Composition. *Frontiers in microbiology* 6:944.
- 531 35. Bourassa L, Susan M, & Butler-Wu (2015) Current and Emerging Technologies for the Diagnosis of Microbial Infections. *Method in Microbiology*:37-87.
- 532 36. Clark AE, Kaleta EJ, Arora A, & Wolk DM (2013) Matrix-assisted laser desorption ionization-time of flight mass spectrometry: a fundamental shift in the routine practice of clinical microbiology. *Clinical microbiology reviews* 26(3):547-603.
- 533 37. Sabatier L, et al. (2003) Pherokine-2 and -3. *European journal of biochemistry* 270(16):3398-3407.
- 534 38. Boulanger N, et al. (2001) Immune response of *Drosophila melanogaster* to infection with the flagellate parasite *Crithidia* spp. *Insect biochemistry and molecular biology* 31(2):129-137.

- 567 39. Uttenweiler-Joseph S, et al. (1998) Differential display of peptides induced during the immune response of *Drosophila*: a matrix-  
568 assisted laser desorption ionization time-of-flight mass spectrometry study. *Proceedings of the National Academy of Sciences of*  
569 *the United States of America* 95(19):11342-11347.
- 570 40. Casteels-Josson K, Zhang W, Capaci T, Casteels P, & Tempst P (1994) Acute transcriptional response of the honeybee peptide-  
571 antibiotics gene repertoire and required post-translational conversion of the precursor structures. *The Journal of biological*  
572 *chemistry* 269(46):28569-28575.
- 573 41. Casteels P, Ampe C, Jacobs F, Vaecq M, & Tempst P (1989) Apidaecins: antibacterial peptides from honeybees. *The EMBO*  
574 *journal* 8(8):2387-2391.
- 575 42. Ishii K, Hamamoto H, & Sekimizu K (2014) Establishment of a bacterial infection model using the European honeybee, *Apis*  
576 *mellifera* L. *PLoS one* 9(2):e89917.
- 577 43. Hetru C & Bulet P (1997) Strategies for the isolation and characterization of antimicrobial peptides of invertebrates. *Methods in*  
578 *molecular biology* 78:35-49.
- 579 44. Pomastowski P, et al. (2019) Analysis of bacteria associated with honeys of different geographical and botanical origin using two  
580 different identification approaches: MALDI-TOF MS and 16S rDNA PCR technique. *PLoS one* 14(5):e0217078.
- 581 45. Acosta Muniz C, Jaillard D, Lemaitre B, & Boccard F (2007) *Erwinia carotovora* Evt antagonizes the elimination of bacteria in the  
582 gut of *Drosophila* larvae. *Cellular microbiology* 9(1):106-119.
- 583 46. Raymann K, Coon KL, Shaffer Z, Salisbury S, & Moran NA (2018) Pathogenicity of *Serratia marcescens* Strains in Honey Bees.  
584 *mBio* 9(5).
- 585 47. Motta EVS, Raymann K, & Moran NA (2018) Glyphosate perturbs the gut microbiota of honey bees. *Proceedings of the National*  
586 *Academy of Sciences of the United States of America* 115(41):10305-10310.
- 587 48. Jifí Danihlik KAMP (2015) Antimicrobial peptides: a key component of honey  
588 bee innate immunity *Journal of apicultural research* 54(2):123-136.
- 589 49. Casteels P, Ampe C, Jacobs F, & Tempst P (1993) Functional and chemical characterization of Hymenoptaecin, an antibacterial  
590 polypeptide that is infection-inducible in the honeybee (*Apis mellifera*). *The Journal of biological chemistry* 268(10):7044-7054.
- 591 50. Casteels P, et al. (1990) Isolation and characterization of abaecin, a major antibacterial response peptide in the honeybee (*Apis*  
592 *mellifera*). *European journal of biochemistry* 187(2):381-386.
- 593 51. Wang J, et al. (2009) Rapid determination of the geographical origin of honey based on protein fingerprinting and barcoding  
594 using MALDI TOF MS. *Journal of agricultural and food chemistry* 57(21):10081-10088.
- 595 52. Soler L, et al. (2016) Intact Cell MALDI-TOF MS on Sperm: A Molecular Test For Male Fertility Diagnosis. *Molecular & cellular*  
596 *proteomics : MCP* 15(6):1998-2010.
- 597 53. Wang H.Y., et al. (2018) Application of a MALDI-TOF analysis platform (ClinProTools) for rapid and preliminary report of MRSA  
598 sequence types in Taiwan. *PeerJ*. 7(6):e5784
- 599 54. Powers, D.M.W. (2011) Evaluation: From precision, recall and F-measure to ROC, informedness, markedness & correlation.  
600 *Journal of Machine Learning Technologies*. 2(1):37-63
- 601 55. McGee, S. (2011) Simplifying Likelihood Ratios. *J Gen Intern Med*. 17(8):647-650

602 **Figure legends**

603 **Figure 1:** Classification by MALDI-MS biotyping of *Micrococcus luteus* (*M. l.*) and *Pectobacterium*  
604 *caratovororum* subsp. *caratovororum*, (*P. c. c.*), *Serratia entomophila*, (*S. e.*) bacteria including the  
605 *Serratia marcescens* (*S. m.*) isolated from a naturally infected bee.

606 The strains used to build the infectious model (*M. l.* and *P. c.c.*) and to assess the computational  
607 capability to discriminate proteomic fingerprints from the same bacterial species (*S. m.* and *S. e.*).  
608 were analyzed in order to confirm their identity based on their molecular profiles by matching the  
609 MALDI MS spectra (mass range  $m/z$  2,000 to 11,000) to the reference strains of the Bruker database  
610 containing 6,903 MSP. The BioTyper parameters to validate the identifications of strains, *i.e.* the  
611 scores and the matching strains (references and library), were obtained for each biotyped bacterial  
612 sample in addition to the MALDI MS spectral gel-view. The dendrogram was built from the Main  
613 Spectra Projection (MSP) statistical mode of calculation, which is used to identify, analyze and  
614 classify the MALDI MS spectra. These bacteria were identified by their scores and classified  
615 according to their distance level (MSP Dendrogram) in comparison to reference strains from the  
616 database MBT Compass 4.1, build 70 (*M. l.* IMET 11249HKJ, *P. c. ssp odoriferum* NB 1892  
617 PAH, *S. m.* 13103\_1 CHB and *S. e.* DSM 12358T DSM). The mass spectra ( $m/z$ ) were transformed  
618 into gel views where the grey scale bar and thickness of the lines refer to the  $m/z$  peak intensities.  
619 Classically, a high confidence identification is obtained with a score between 2.00 and 3.00, a low  
620 confidence identification with a score between 1.70 and 1.99 and a failed identification with a score  
621 strictly below 1.70. The mass spectra ( $m/z$ ) were transformed into gel views where the grey scale bar  
622 and thickness of the lines refer to the  $m/z$  peak intensities.

623

624 **Figure 2:** Differential PCA-based statistical analyses and hierarchical clustering of individual  
625 hemolymph samples from the biological models.

626 Total averaged spectra were fingerprinted by MALDI MS from the infected and control individuals  
627 (A). The individual spectra were subjected to PCA analysis, which discriminated the hemolymph  
628 molecular mass fingerprints of *Micrococcus luteus* (*M. l.* in blue), *Pectobacterium caratovororum* subsp.  
629 *caratovororum* 15 (*P. c. c.* in green) and control (red) groups (B); arrows mark the mismatched outliers.  
630 An unsupervised hierarchical clustering based on the PCA results classified the individual spectra  
631 according to the lowest (70% left panel C) and highest (95%, right panel C) limits of explained  
632 variances.

633 **Figure 3:** Heat-map of four antimicrobial peptides (AMPs) from *Apis mellifera*, Apidaecin 1A,  
634 Abaecin, Defensin 1A and Hymenoptaecin correlating with the MALDI MS fingerprints (102  $m/z$ ) of  
635 the hemolymph samples.

636 Per-peak MALDI MS correlation in standard mode between the AMP molecular ions of Apidaecin 1A  
637 ( $m/z$  2,107), Abaecin ( $m/z$  3,878), Defensin 1A ( $m/z$  5,519) and Hymenoptaecin ( $m/z$  10,270), and the  
638 MALDI MS fingerprints of the biological model following an experimental infection with either

639 *Micrococcus luteus* (*M. l.*) in blue, or *Pectobacterium carotovorum* subs. *carotovorum* (*P. c. c.*) in  
640 green, and the control experiment (non-experimentally infected bees, in red). Each rectangle in the  
641 heat map dendrogram represents the abundance level (scale from -1 to +1 from the lowest in red to the  
642 highest in green, respectively) of the area of each AMP cross-related with each molecular ion from the  
643 fingerprint.

644 **Figure 4:** Genetic Algorithm-based classifier used to discriminate non-experimentally infected  
645 (Control, red) bees from experimentally infected ones with *Micrococcus luteus* (*M. l.*, in blue) or  
646 *Pectobacterium carotovorum* subsp. *carotovorum* (*P. c. c.*, in green).

647 Nine molecular ion peaks determined by the computational model and ranked according to their  
648 weight indexes were found as the best discriminative features of the hemolymph samples on the basis  
649 of statistical criteria (Standard deviation determined for each curve representing the molecular ions of  
650 the model and the box plots showing the first and third interquartile range with line denoting the  
651 median and whiskers encompassing 95% of the individuals). The spectral gel view represents the  
652 intensity of each of the discriminative peaks represented by their weight index and the *m/z* values (Da)  
653 found within the individual spectra of the biological models.

654 **Figure 5:** Differential PCA-based analysis of hemolymph fingerprints following infection with two  
655 *Serratia* strains, *Serratia marcescens* (*S. m.*) isolated from a naturally infected *Apis mellifera* and *S.*  
656 *entomophila* (*S. e.*) and statistical relevance of predictive markers.

657 The differential fingerprinting and PCA analysis discriminated the non-experimentally infected bees  
658 (control in black) and the experimentally infected groups (*S. e.* in red or *S. m.* in green) with n=13 bees  
659 per group (A). The detected peaks in the differential analysis with the highest and lowest discriminant  
660 scores were assessed statistically by measuring the standard deviation and the 95% confidence  
661 interval. (B). The most interesting peaks classified through the Receiver Operating Characteristics  
662 (ROC) curves are shown using the Area Under Curve (AUC) calculation (C). The biological model  
663 used as the positive class was the experimental *S. m.* infection and the sensibility (True Positives) and  
664 specificity (False Positives) parameters were determined for all calculated peaks. Eight markers  
665 defined by their *m/z* values (Da) were found as the best predictive markers (AUC>0.8) for  
666 discriminating honey bee infections (*S. e.* or *S. m.*). Conversely, the two least discriminant peaks had  
667 an irrelevant AUC (  $\square$  0.5) with ROC curves fitting the non-discriminant line of the statistical test (D).

668 Table 1: External validation of the genetic algorithm classifier model using a new set of hemolymph  
669 spectra.

670 Fifty-seven hemolymph samples were collected individually from the biological models *M. l.*, *P. c. c.*  
671 and control prior to being fingerprinted. The spectra were submitted to the GA-based computational  
672 model in order to assess classifier performance.

673

674 Table 2: Assessment of the Genetic Algorithm classifier performance.

675 Based on the result of the external validation, the performance of the GA-based classifier model was  
676 assessed for each of the biological models by calculating the accuracy, the sensitivity, the specificity,  
677 the specific-positive and -negative likelihood ratios (all five expressed as percentage), informedness,  
678 p-value and q-value.

679

680 Table S1: Peak-to-peak correlation scores of the four Antimicrobial peptides (abaecin, apidaecin,  
681 defensin and hymenoptaecin) with the mass fingerprint of hemolymph across the three biological  
682 models (non-experimentally infected/control, *M. l.* for *Micrococcus luteus* infection and *P. c. c.* for  
683 *Pectobacterium carotovorum* subsp. *carotovorum* 15 infection)

684 Table S2: Results for the external validation of the genetic algorithm-based classifier

685 Figure S1: Assessment of ROC curves of Apidaecin, Abaecin and Defensin to discriminate *S.*  
686 *marcescens*- from *S. entomophila*-infected honey bees.

687 Figure S2: BeeTyping workflow for machine learning data-driven analysis of honey bee infections.

688 The methodological approach relied on four main steps addressing major tasks.

689 Step 1: Sampling of unchallenged bees (controls) and experimental infection obtained by pricking  
690 honey bees with live strains of *P. c. c.* and *M. l.*. Step 2: Individual hemolymph collections followed  
691 by MALDI-TOF MS molecular mass fingerprinting, and strain identification by MALDI biotyping.  
692 Step 3: Multi-stage processing of MALDI MS fingerprints including recalibration, peak picking,  
693 normalization and statistical calculation of individual MS spectra through Principal Component  
694 Analysis (PCA) for revealing differential molecular patterns across infection groups. Step 4: Genetic  
695 algorithm-based computational model for recognition and classification of honey bee infection using  
696 PCA discriminant analysis. Barcodes were built following the molecular fingerprints that discriminate  
697 control bees from bees infected either with *M. l.* or with *P. c. c.*.

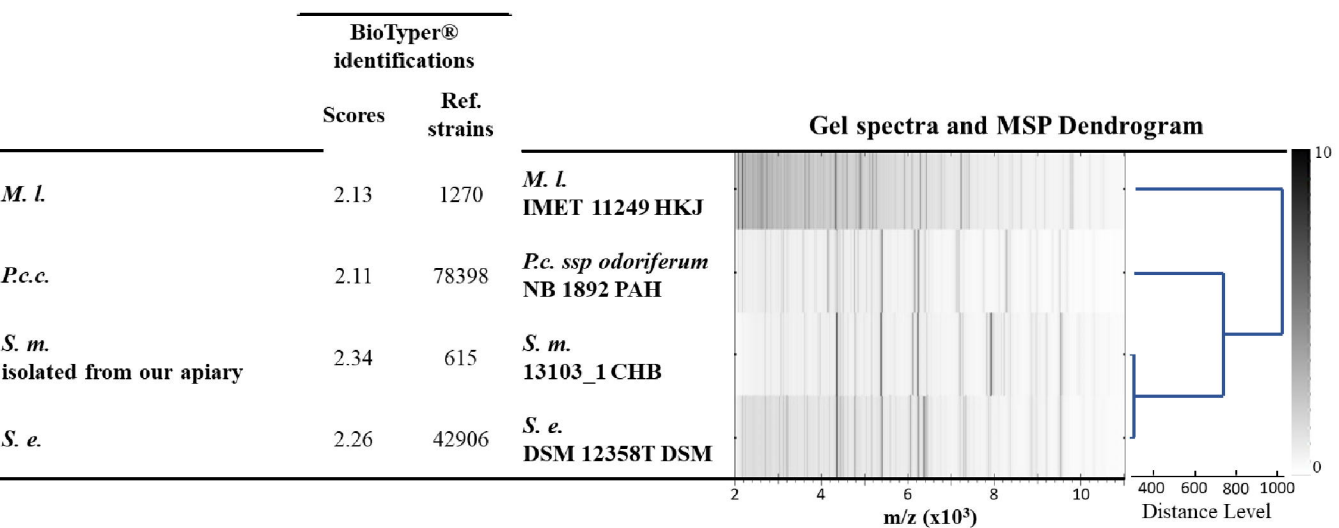

A/ Averaged MALDI MS spectra of the haemolymphs from the biological models

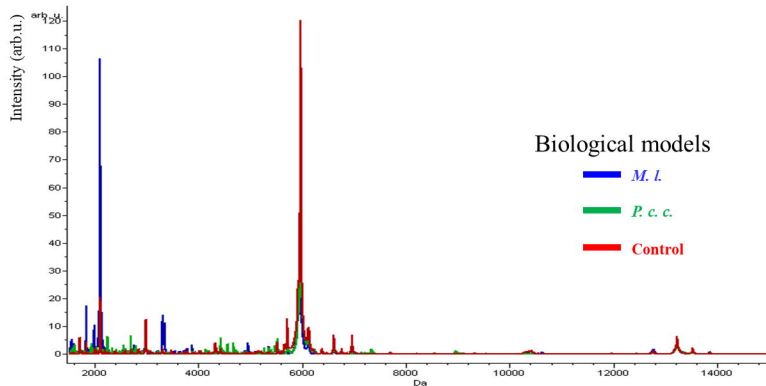

B/ PCA plot score discriminating the individual hemolymphs spectra

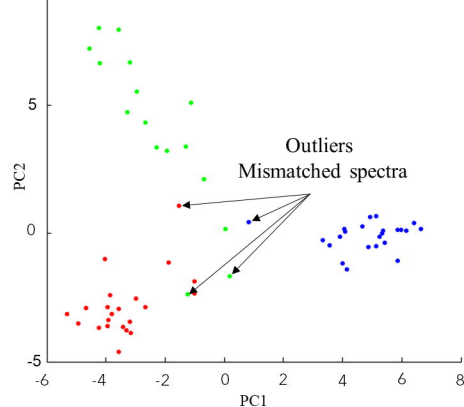

C/ Unsupervised Hierarchical Clustering dendrograms based on PCA

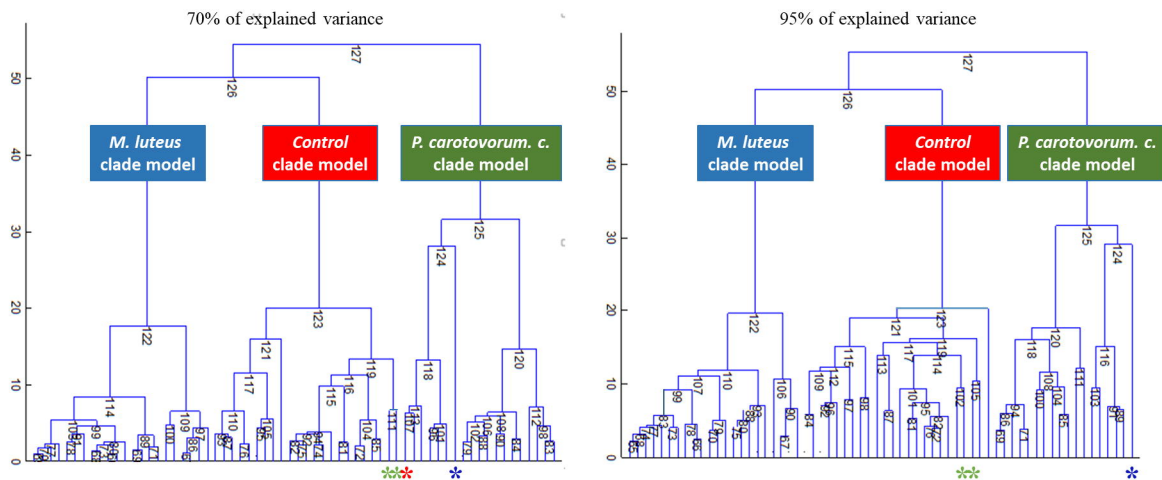

PCA results and Data reduction

Unsupervised hierarchical clustering

| Distance Method | Spectra datasets | % of Explained Variance | Number (N) of found mismatches out of a total set of 64 spectra                                                        |
|-----------------|------------------|-------------------------|------------------------------------------------------------------------------------------------------------------------|
| Euclidean       | Normalized       | 70 (lowest limit)       | N=4 i.e. 1 Control (*) in <i>P. c. c.</i> ; 1 <i>M. l.</i> (*) in <i>P. c. c.</i> ; 2 <i>P. c. c.</i> (**) in Controls |
|                 | Normalized       | 95 (highest limit)      | N=3 i.e. 1 <i>M. l.</i> (*) in <i>P. c. c.</i> ; 2 <i>P. c. c.</i> (**) in Controls                                    |

# AMPs DENDROGRAM

MOLECULAR MASS FINGERPRINT DENDROGRAM

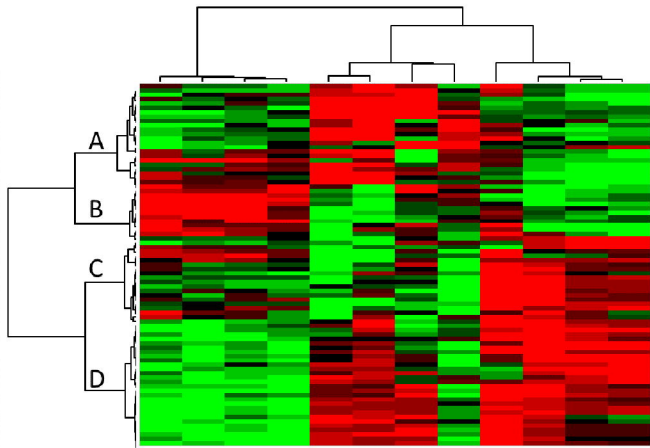

- m/z* 2,107 Apidaecin IA control
- m/z* 3,878 Abaecin control
- m/z* 5,519 Defensin IA control
- m/z* 10,270 Hymenoptaecin control
- m/z* 3,878 Abaecin *P.c.c.* model
- m/z* 2,107 Apidaecin IA *P.c.c.* model
- m/z* 5,519 Defensin IA *P.c.c.* model
- m/z* 10,270 Hymenoptaecin *P.c.c.* model
- m/z* 2,107 Apidaecin IA *M.I.* model
- m/z* 3,878 Abaecin IA *M.I.* model
- m/z* 5,519 Defensin IA *M.I.* model
- m/z* 10,270 Hymenoptaecin *M.I.* model

Scale intensity  
of cross-correlating  
ion peaks

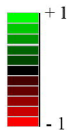



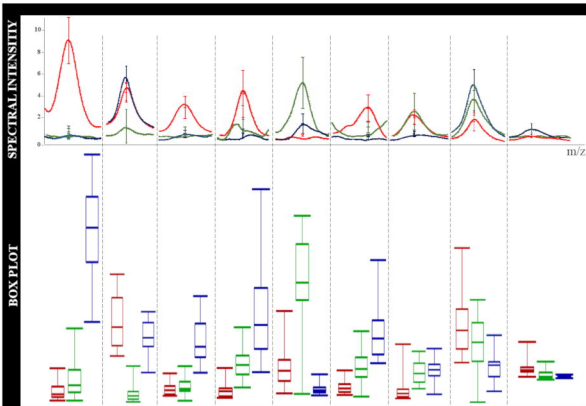

Biological Models

- *M. luteus*
- *P. carotovorum carotovorum*
- Control

| Best Discriminant peaks | m/z ions peaks            | 3348.17 | 6959.43 | 4954.72 | 1567.63 | 2701.04 | 1610.44 | 5354.11 | 6608.12 | 5603.01 |
|-------------------------|---------------------------|---------|---------|---------|---------|---------|---------|---------|---------|---------|
|                         | Weight index              | 6.24    | 4.29    | 3.71    | 3.23    | 3.16    | 2.87    | 2.43    | 1.98    | 1.97    |
| Gel View                | <i>M. l.</i> infection    |         |         |         |         |         |         |         |         |         |
|                         | <i>P. c. c.</i> infection |         |         |         |         |         |         |         |         |         |
|                         | Controls                  |         |         |         |         |         |         |         |         |         |

### Classifier Model Scoring

| Biological model               | Classifier | Recognition capability (%) | Overall recognition (%) | Cross validation (%) | Overall validation (%) |
|--------------------------------|------------|----------------------------|-------------------------|----------------------|------------------------|
| <b>Unchallenged (controls)</b> |            | 100                        |                         | 91.51                |                        |
| <i>M.l.</i> infection          | Genetic    | 100                        | 97.92                   | 94.40                | 91.93                  |
| <i>P.c.c.</i> infection        | Algorithm  | 93.75                      |                         | 89.87                |                        |

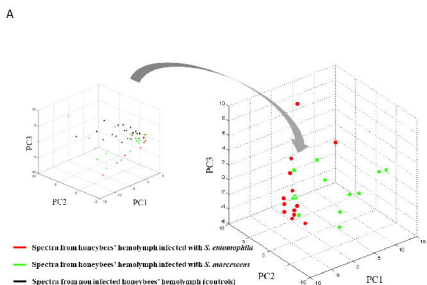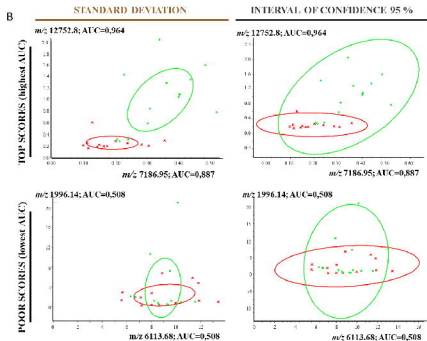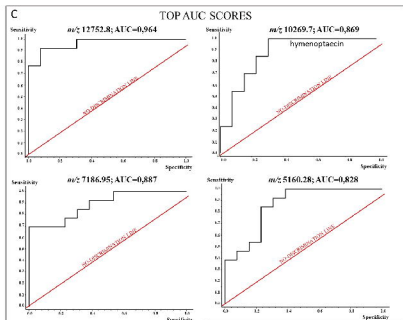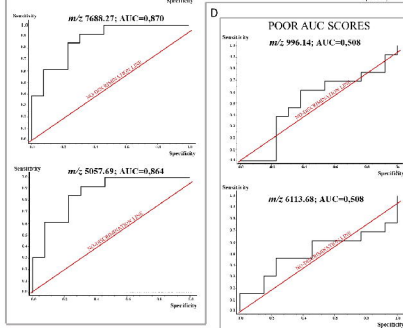

0.5 < AUC < 1 ; positive test made with "honey bees are infected by *Smarcescens*."
